# Supplementary material for: Effectiveness of Influenza Vaccination in Hospitalized Cases in Catalonia During the 2017-2018 Season
Source: Preprints.org preprint supplement (doi:10.20944/preprints202012.0299.v1), 2020-12-12
Supplement: Supplementary file 2 [file Table 2.docx]

**Table 2 Distribution of main characteristics of influenza hospitalized cases by source: Severe hospitalized laboratory confirmed influenza (SHLCI) and Hospitalized laboratory confirmed influenza from emergency room discharge data (HLCI). Catalonia, 2017-2018**

| **Patient parameters** | **Total hospitalized laboratory confirmed influenza cases**  **n=1414** | **SHLCIa**  **n=1227** | **HLCIb**  **n=187** | **p value** |
| --- | --- | --- | --- | --- |
| **Age mean (SD) c** | 71.5 (15.2) | 71.1 (15.3) | 68.5 (16.0) | 0.008* |
| **Age group** |  |  |  |  |
| >=60y | 1118 (79.1%) | 959 (78.2%) | 159 (85.0%) | 0.040 |
| 18-59y | 296 (20.9%) | 268 (21.8%) | 28 (15.0%) |  |
| **Gender** |  |  |  |  |
| Male | 804 (56.9%) | 709 (57.8%) | 95 (50.8%) | 0.086 |
| Female | 610 (43.1%) | 518 (42.2%) | 92 (49.2%) |  |
| **Comorbidities (at least one)** | |  |  |  |
| Yes | 1127 (79.7%) | 956 (77.9%) | 171 (91.4%) | <0.001 |
| No | 287 (20.3%) | 271 (22.1%) | 16 (8.56%) |  |
| **Influenza vaccination** | |  |  |  |
| Yes | 465 (32.9%) | 440 (35.9%) | 25 (13.4%) | <0.001 |
| No | 949 (67.1%) | 787 (64.1%) | 162 (86.6%) |  |
| **NI d  treatment** |  |  |  |  |
| Yes | 1299 (91.9%) | 1146 (93.4%) | 153 (82.3%) | <0.001 |
| **NI d treatment (timing)** | |  |  |  |
| <=48h from onset of symptoms) | 511 (36.9%) | 452 (37.7%) | 59 (31.7%) | <0.001 |
| >48h from onset of symptoms) | 759 (54.8%) | 665 (55.5%) | 94 (50.5%) |  |
| No | 114 (8.07%) | 81 (6.60%) | 33 (17.7%) |  |

a SHLCI: Severe hospitalized laboratory confirmed influenza; b HLCI: Hospitalized laboratory confirmed influenza from emergency

room discharge data ; c SD: Standard deviation; d NI: Neuraminidase inhibitor; * t-Student
