# Supplementary material for: Effectiveness of Influenza Vaccination in Hospitalized Cases in Catalonia During the 2017-2018 Season
Source: Preprints.org preprint supplement (doi:10.20944/preprints202012.0299.v1), 2020-12-12
Supplement: Supplementary file 5 [file Table 5.docx]

**Table 5: Vaccine effectiveness in preventing intensive care unit admission in severe hospitalized laboratory confirmed influenza cases and in hospitalized laboratory confirmed influenza cases. Catalonia, 2017-2018**

|  | **ICU admission** | | | **No ICU admission** | **OR** | **aOR*** | **p value** | **Adjusted VE** |
| --- | --- | --- | --- | --- | --- | --- | --- | --- |
| **All patients n=1414** | **n=214 (15.1%)** | | | **n=1200 (84.9%)** | ***(95%CI)*** | ***(95%CI)*** |  | 95%CI |
| **Influenza Vaccination** |  | |  | | | | | |
| Vaccinated  (465; 32.9%) | 52 (24.3%) | 413 (34.4%) | | | 0.61 (0.44;0.85) | 0.69 (0.48;0.99) | 0.040 | 31% (1;52) |
| Unvaccinated (949;67.1%) | 162 (75.7%) | 787 (65.6%) | | |  | Ref. |  |  |
| **SHLCIa n=1227** | **210 (17.1%)** | **1017 (82.9%)** | | |  |  |  |  |
| Vaccinated  (440: 35.9%) | 52 (24.8%) | 388 (38.2%) | | | 0.53 (0.38;0.75) | 0.60 (0.42;0.87) | 0.007 | 40% (13;58) |
| Unvaccinated  (787; 64.1%) | 158 (75.2%) | 629 (61.8%) | | |  | Ref. |  |  |
| **HLCIb n=187** | **4 (2.1%)** | **183 (97.9%)** | | |  |  |  |  |
| Vaccinated  (25;13.3%) | 0 (0.0%) | 25 (13.7%) | | | 0.69 (0.005;6.78) | Not computable | ---- | ---- |
| Unvaccinated  (162; 86.7%) | 4 (100%) | 158 (86.3%) | | |  |  |  |  |

*Odds ratio adjusted by age, sex, at least one comorbidity and NI treatment NI: Neuraminidase Inhibitor aSHLCI:Severe hospitalized laboratory confirmed influenza; bHLCI: Hospitalized laboratory confirmed influenza (due to separation, penalized Firth’s logistic regression used)
